# Supplementary material for: Design, Synthesis and Pharmacological Evaluation of New Quinoline-Based Panx-1 Channel Blockers
Source: MDPI journal article supplement (doi:10.3390/ijms24032022), 2023-01-19
Supplement: s1 [file s1]

**Supplementary Materials**  
**for**  
**Design, synthesis and pharmacological evaluation of new quinoline-based**  
**Panx-1 channel blockers**

*Letizia Crocetti <sup>1</sup>, Maria Paola Giovannoni <sup>1</sup>, Gabriella Guerrini <sup>1\*</sup>, Silvia Lamanna <sup>1</sup>, Fabrizio Melani <sup>1</sup>, Gianluca Bartolucci <sup>1</sup>, Marco Pallecchi <sup>1</sup>, Paola Paoli <sup>2</sup>, Martina Lippi <sup>2</sup>, Junjie Wang <sup>3</sup> and Gerhard Dahl <sup>3</sup>*

<sup>1</sup> Neurofarba, Pharmaceutical and Nutraceutical Section, University of Florence, Via Ugo Schiff 6, 50019, Sesto Fiorentino, Italy

<sup>2</sup> Department of Industrial Engineering, University of Florence, Florence, Italy

<sup>3</sup> Department of Physiology and Biophysics University of Miami School of Medicine 1600 N.W. 10<sup>th</sup> Avenue Miami, Florida 33136

**\*Corresponding Author**

Dr. Gabriella Guerrini

Department of Neurofarba,

University of Florence, Via Ugo Schiff 6,

Sesto Fiorentino, Firenze 50019, Italy.

Tel. +39 055 4573766

Email: [gabriella.guerrini@unifi.it](mailto:gabriella.guerrini@unifi.it)

**Table of Contents:**

1. Synthesis of reaction intermediates
2. NMR spectra (<sup>1</sup>H, HSQC, HMBC) of some reaction intermediates (**4c**, **4e**, **5c**, **5e**) and NMR spectra (<sup>1</sup>H and <sup>13</sup>C) of some representative final compounds (**6a**, **6d**, **6g**, **10**, **13c**, **13d**, **13f**, **13g** and **15**)
3. Chemical stability tests (**Tables S1–S4** and **Figures S1–S6**).
4. Single-Crystal X-ray Diffraction (**Table S5** and **Figure S7**).

5. ADMET assessment (**Tables S6–S11**).
6. Elemental analysis (**Table S12**).

### 1. Synthesis of reaction intermediates

The scheme describes the procedures used for the synthesis of some reagents (others are commercially available) to obtain the final compounds. For reagents **3a–c**, the synthetic process involves alkylation of commercial 4-nitrobenzenesulfonamide (**1**) with the appropriate halide derivative and  $K_2CO_3$  in dry DMF. Specifically, 1-bromopropane is used to obtain the monoalkylated and bialkylated products **3a,b** (Carmellino, Caccialanza, & Borgogna, 1983) and benzyl bromide is used to obtain the bialkylated product **3c** (Hui Po & Sheu Ju, 1987). Finally, for compound **7**, the synthetic process involved three steps: esterification of commercial 4-sulfamoylbenzoic acid (**4**) resulting in the corresponding ethyl ester **5** (Turkes, et al., 2019); alkylation of the sulfonamide with benzyl bromide (using the same procedure reported above for reagents **3a–c**) leading to the dibenzylated intermediate **6** (Caturla, et al., 2004); and finally, hydrolysis of the ester to acid **7** (Hanke, et al., 2013).

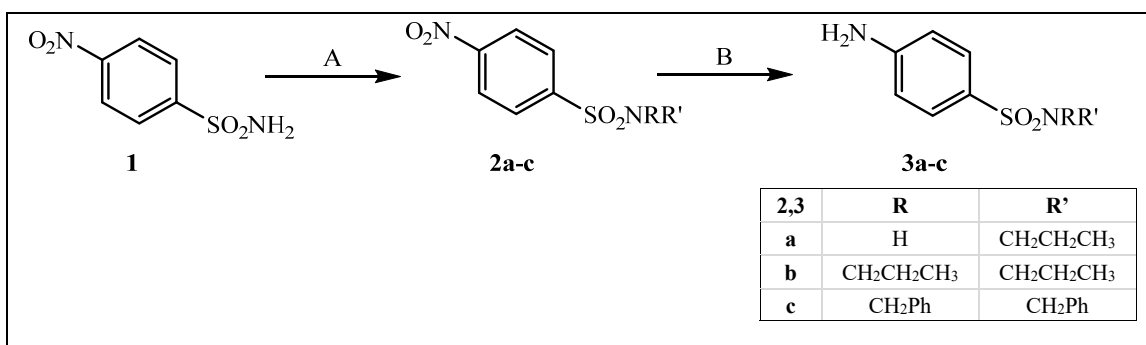

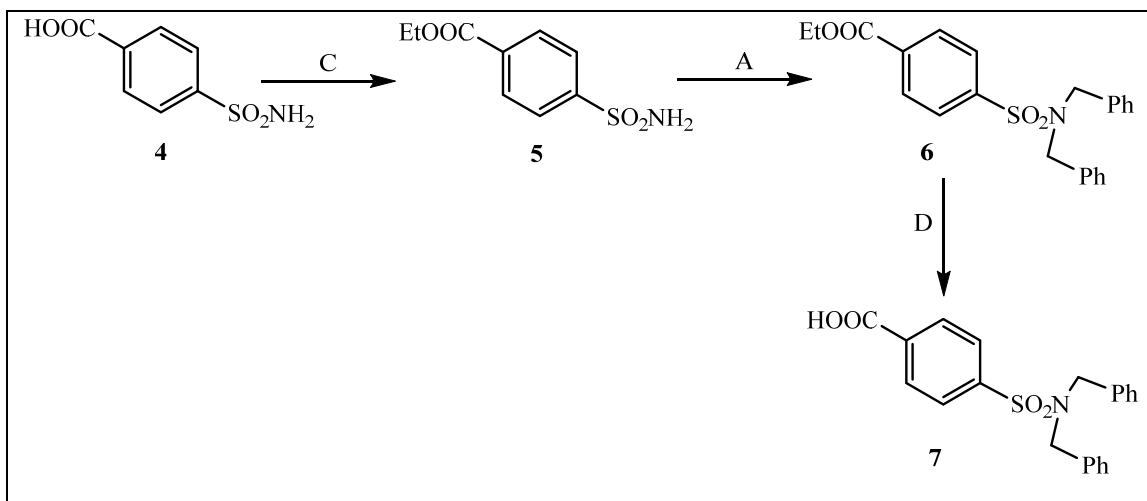

**Reagent and conditions:**

**A:**  $\text{K}_2\text{CO}_3$ , dry DMF, r.t., 30', then appropriate halide derivative, 80°C, 3h.

**B:**  $\text{H}_2$ , Pd/C, EtOH abs, 30 psi, r.t., 1h 30'.

**C:** EtOH abs,  $\text{H}_2\text{SO}_4$  conc., reflux, 5h.

**D:** EtOH 96%, NaOH 40%, reflux, 2h.

**2. NMR spectra of some reaction intermediates and representative final compounds**

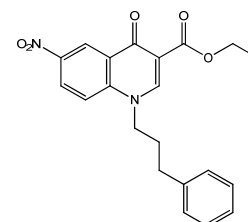

<sup>1</sup>H NMR compound 4c  
CDCl<sub>3</sub>

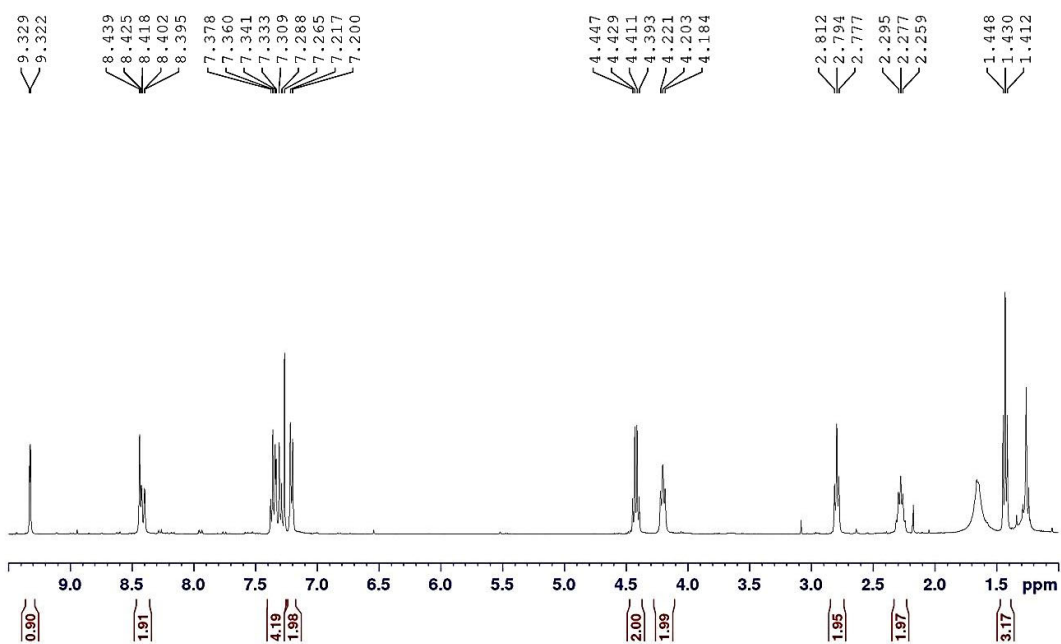

HSQC compound 4c

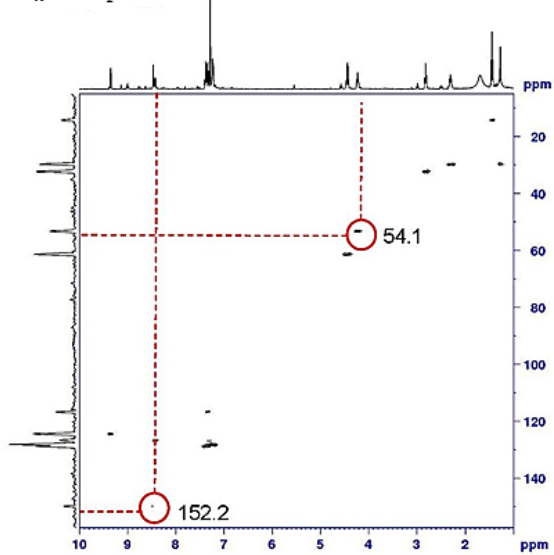

HMBC compound 4c

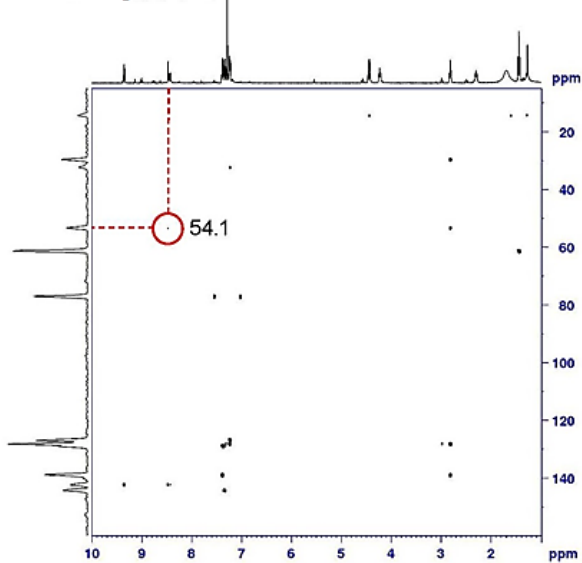

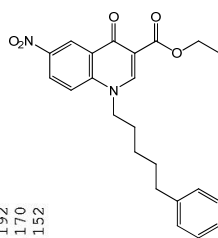

<sup>1</sup>H NMR compound 4e  
CDCl<sub>3</sub>

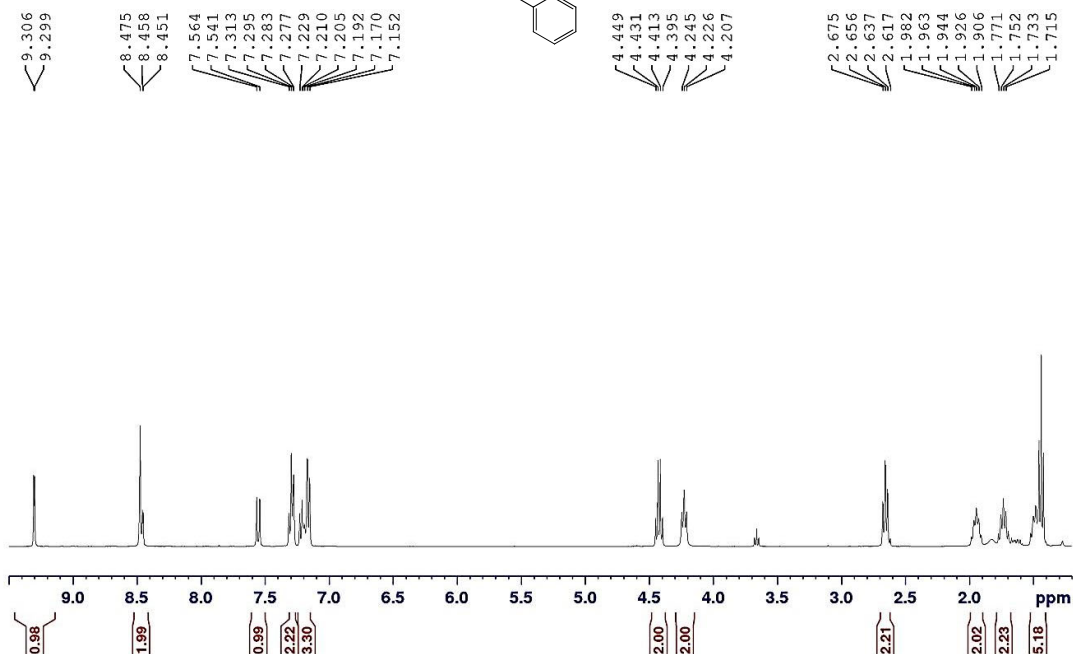

HSQC compound 4e

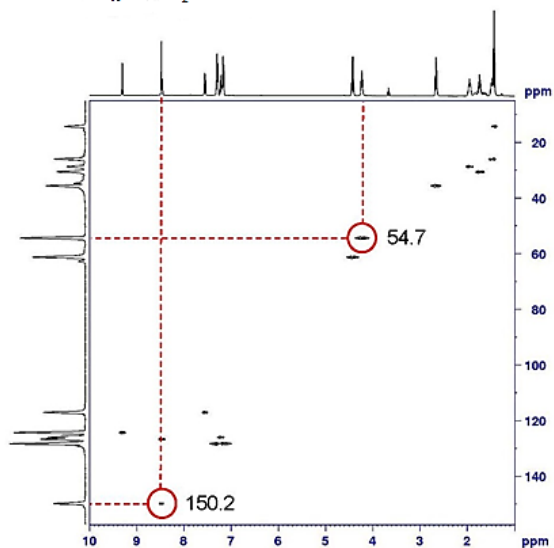

HMBC compound 4e

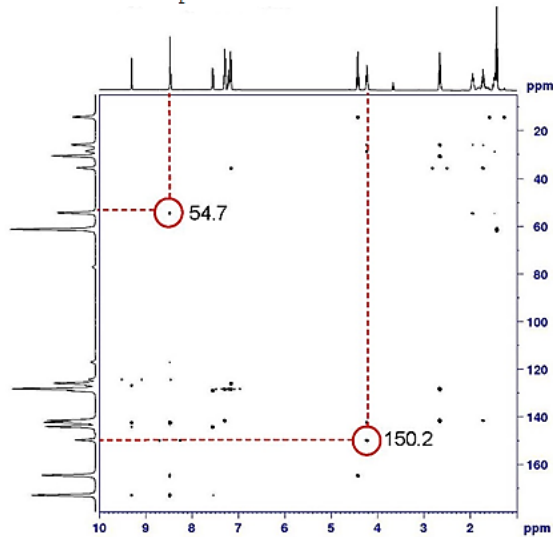

<sup>1</sup>H NMR compound 5c  
CDCl<sub>3</sub>

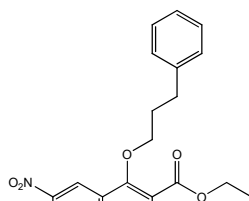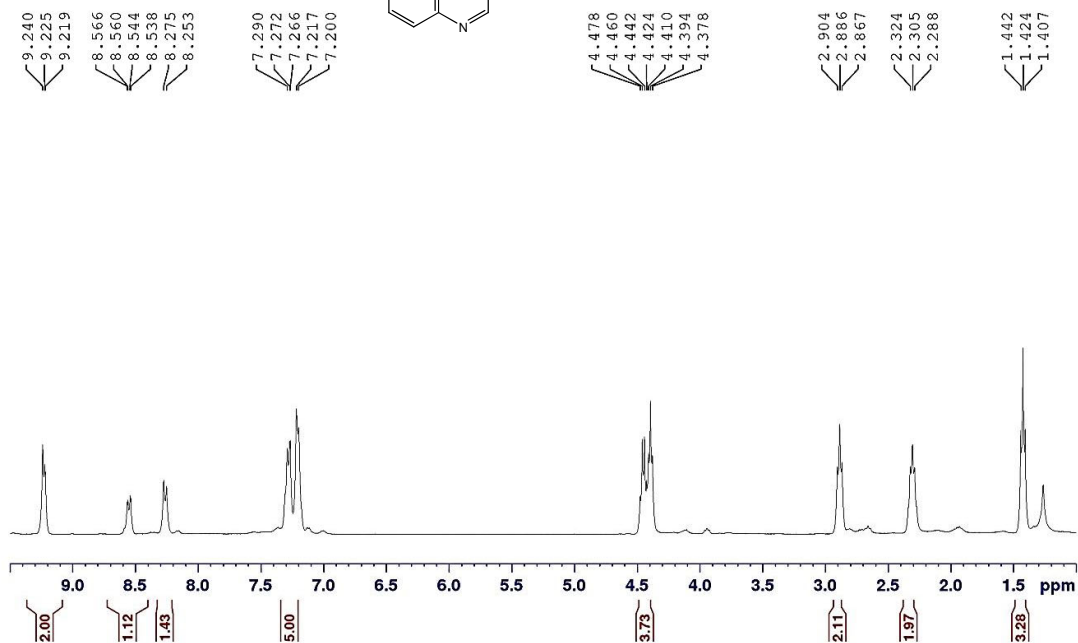

HSQC compound 5c

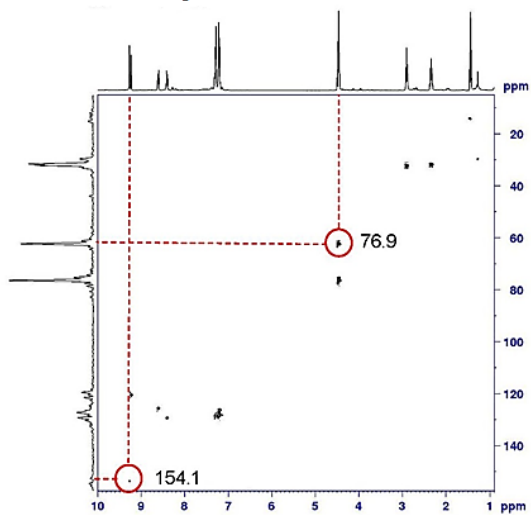

HMBC compound 5c

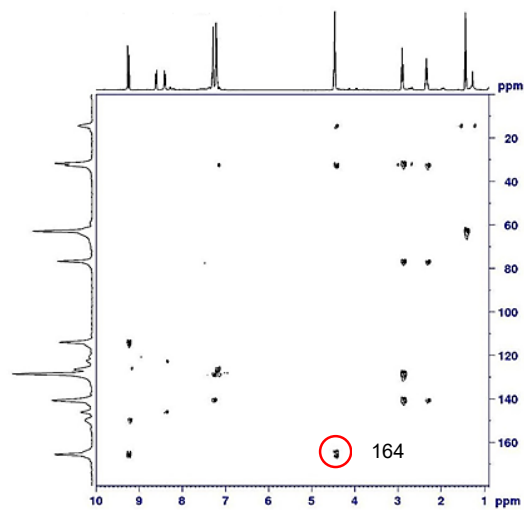

<sup>1</sup>H NMR compound 5e  
CDCl<sub>3</sub>

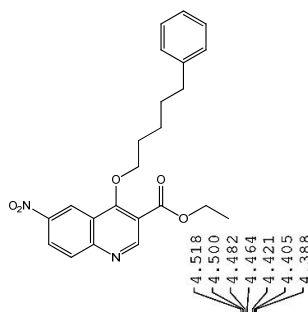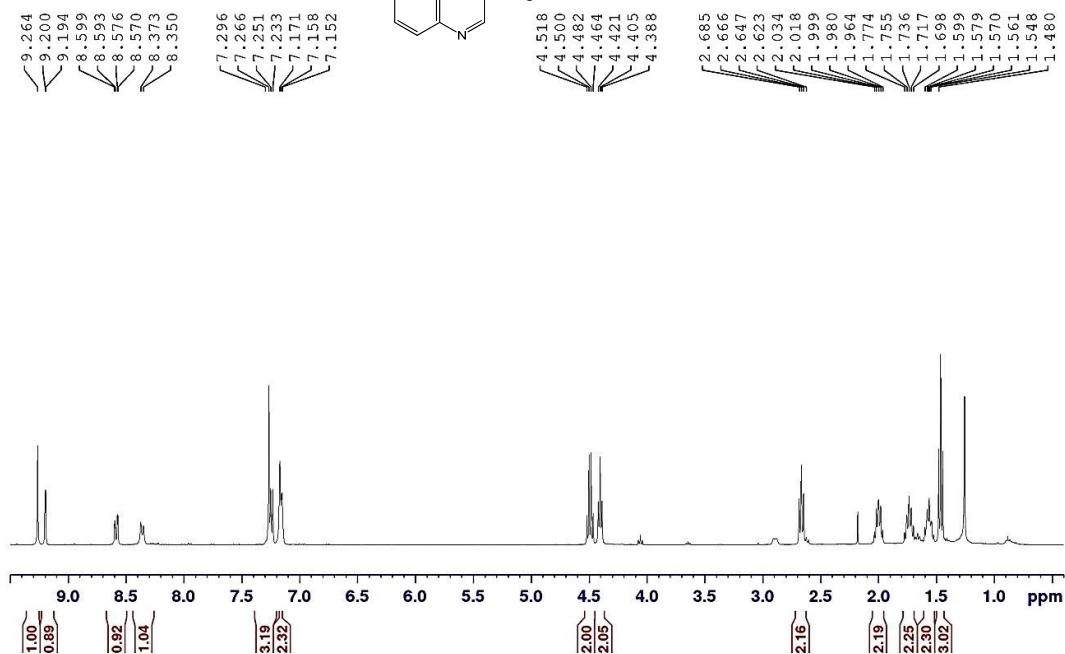

HSQC compound 5e

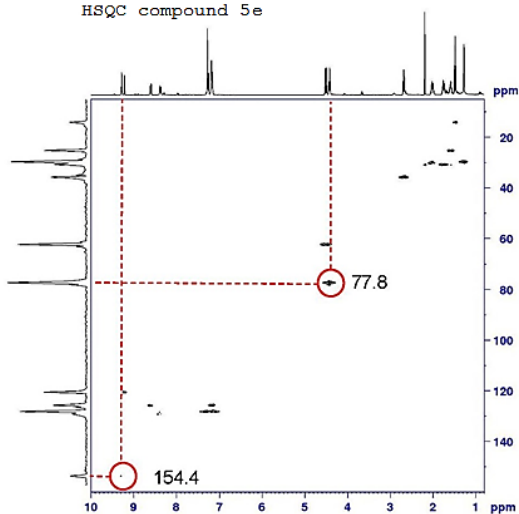

HMBC compound 5e

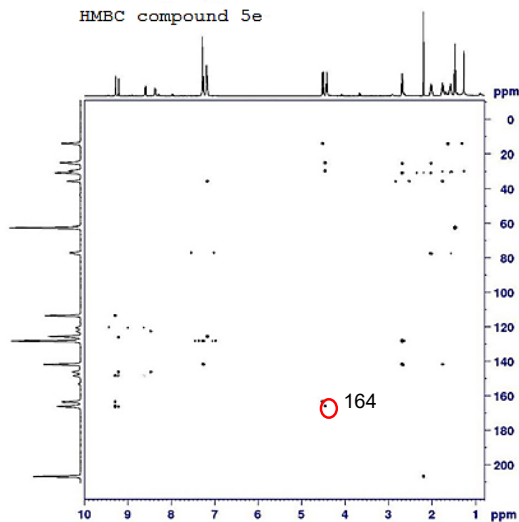

<sup>1</sup>H NMR compound 6a  
DMSO

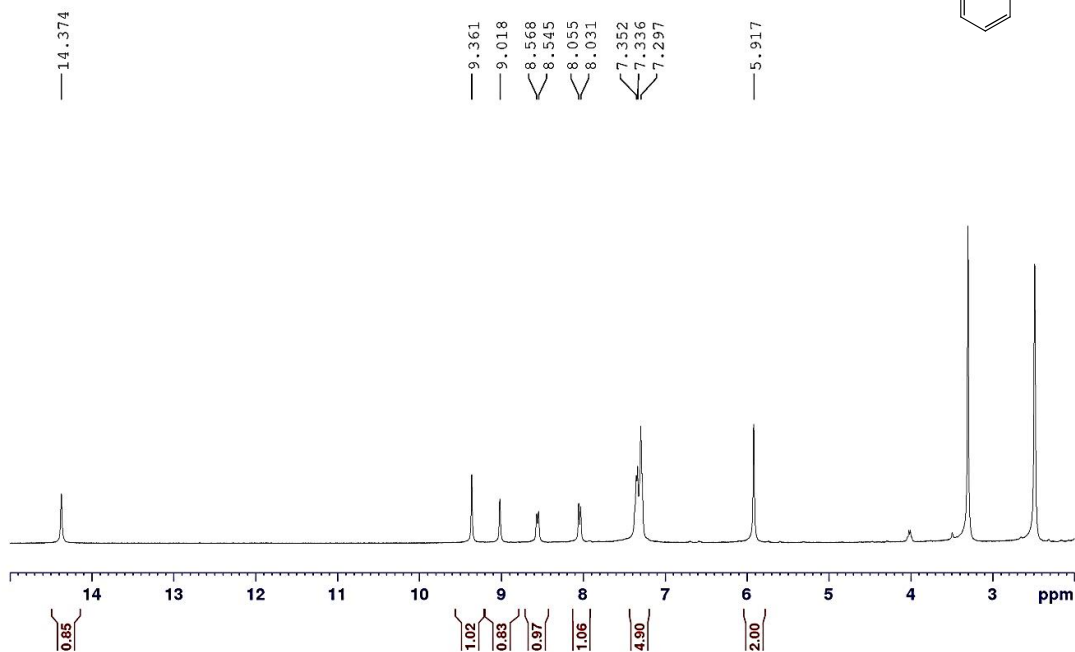

<sup>13</sup>C NMR compound 6a  
DMSO

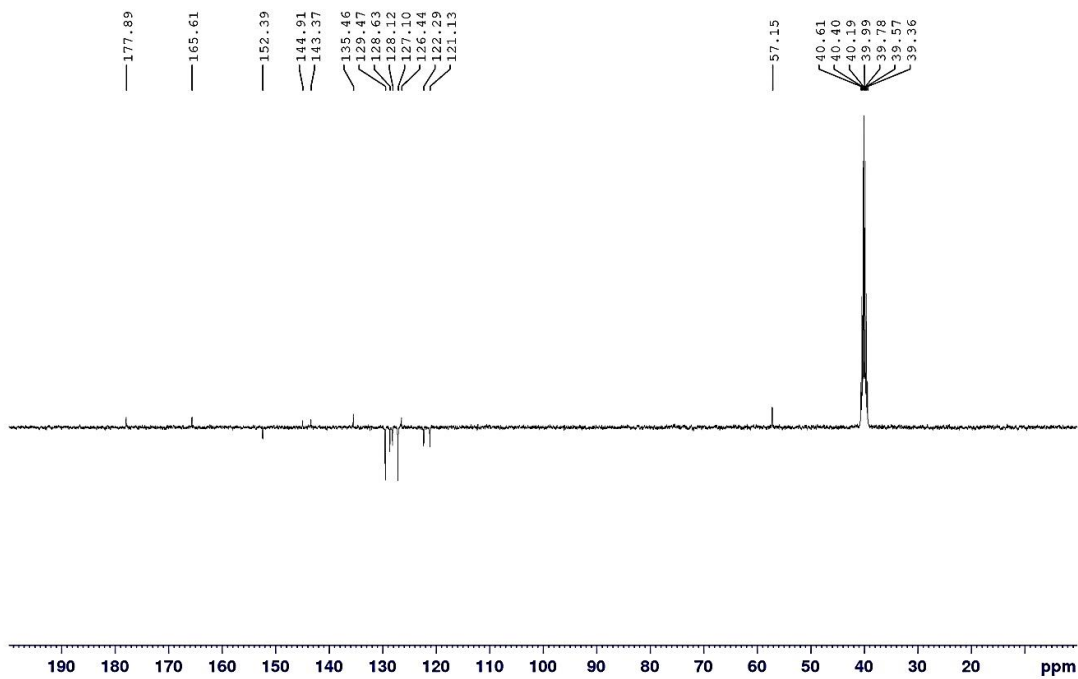



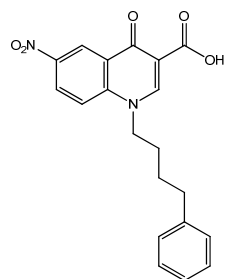

<sup>1</sup>H NMR compound 6d  
DMSO

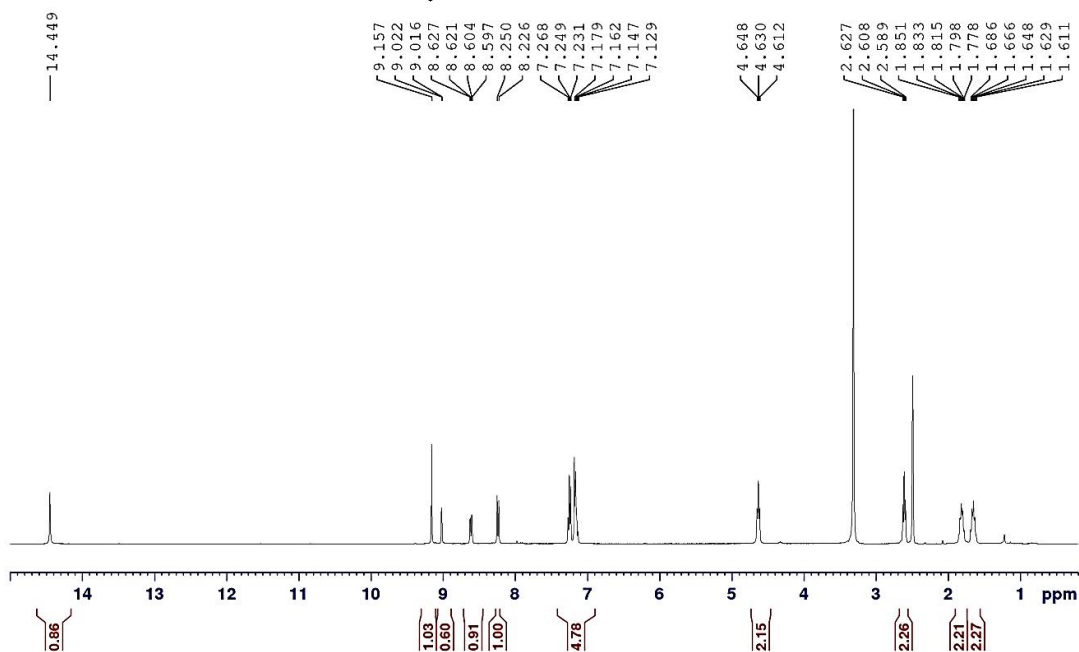

<sup>13</sup>C NMR compound 6d  
DMSO

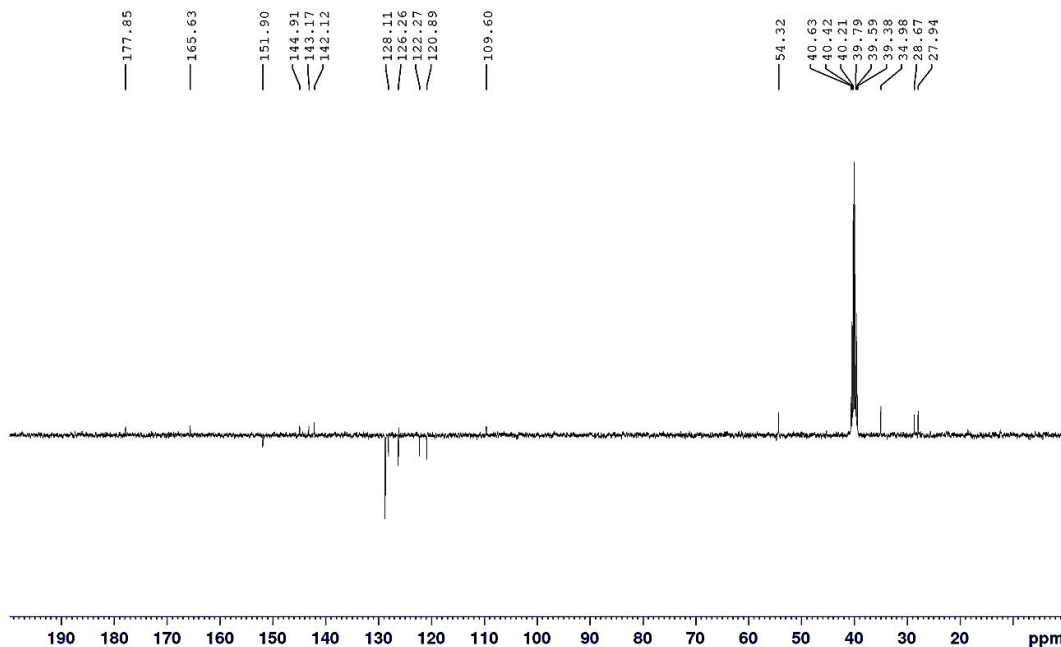

<sup>1</sup>H NMR compound 6g  
DMSO

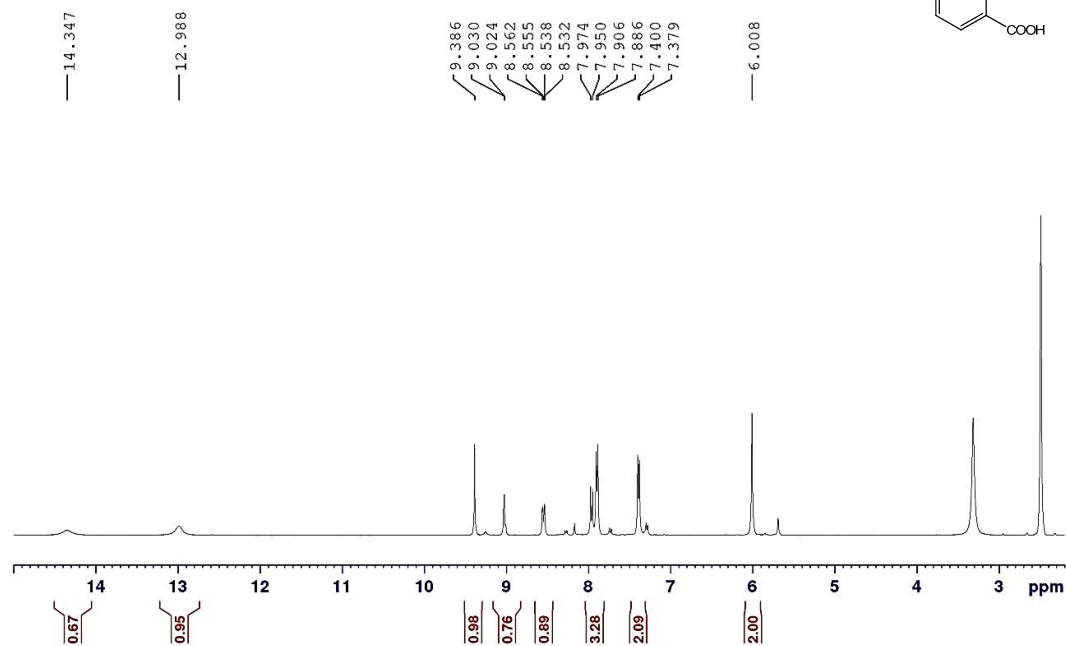

<sup>13</sup>C NMR compound 6g  
DMSO

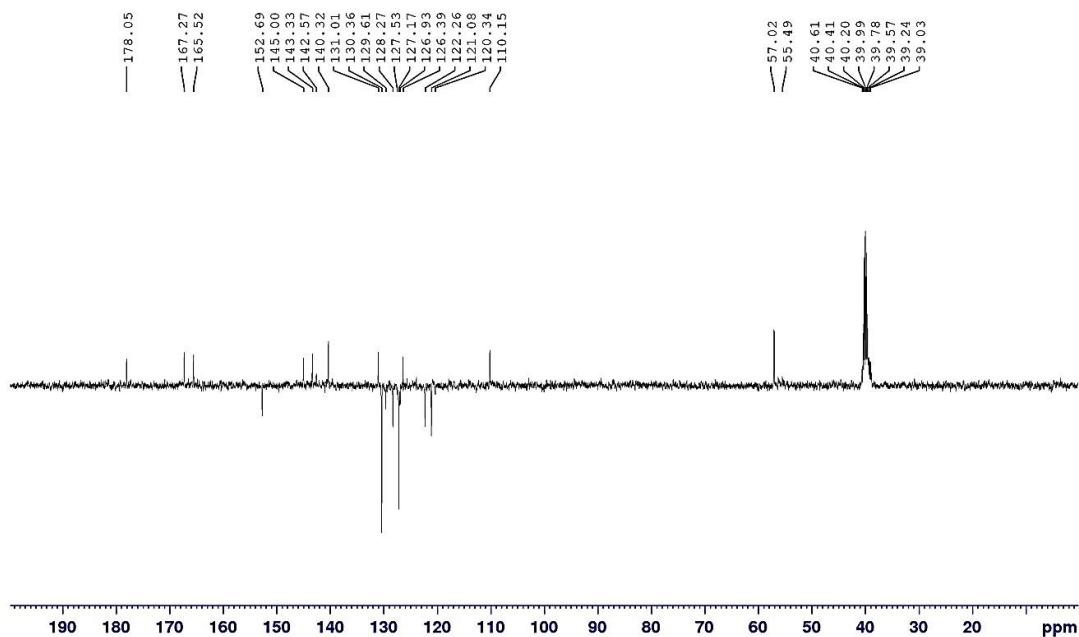

<sup>1</sup>H NMR compound 10  
DMSO

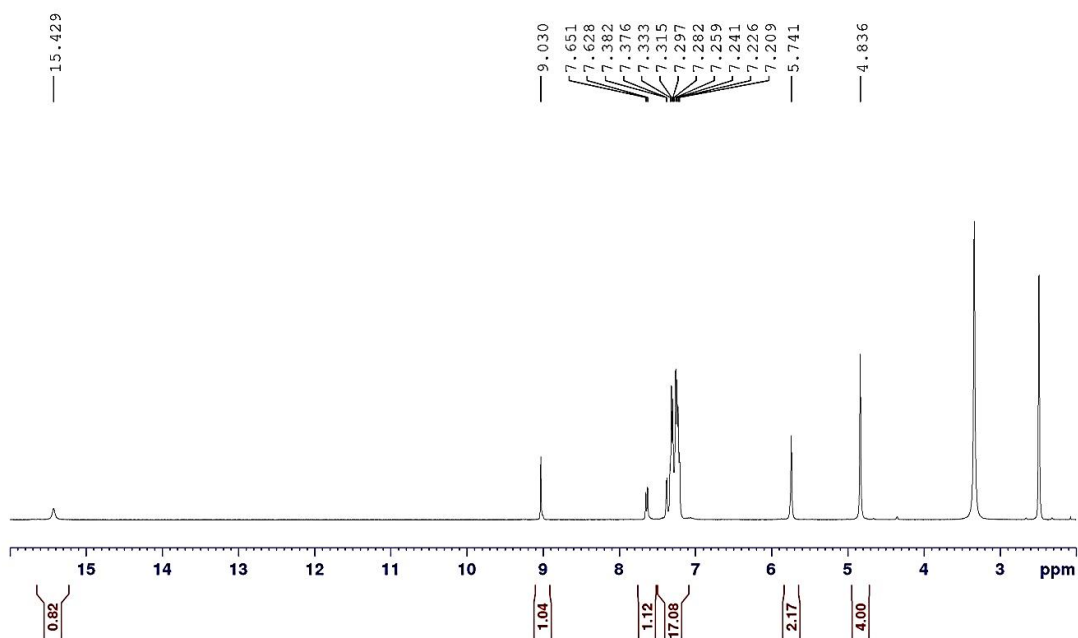

<sup>13</sup>C NMR compound 10  
DMSO

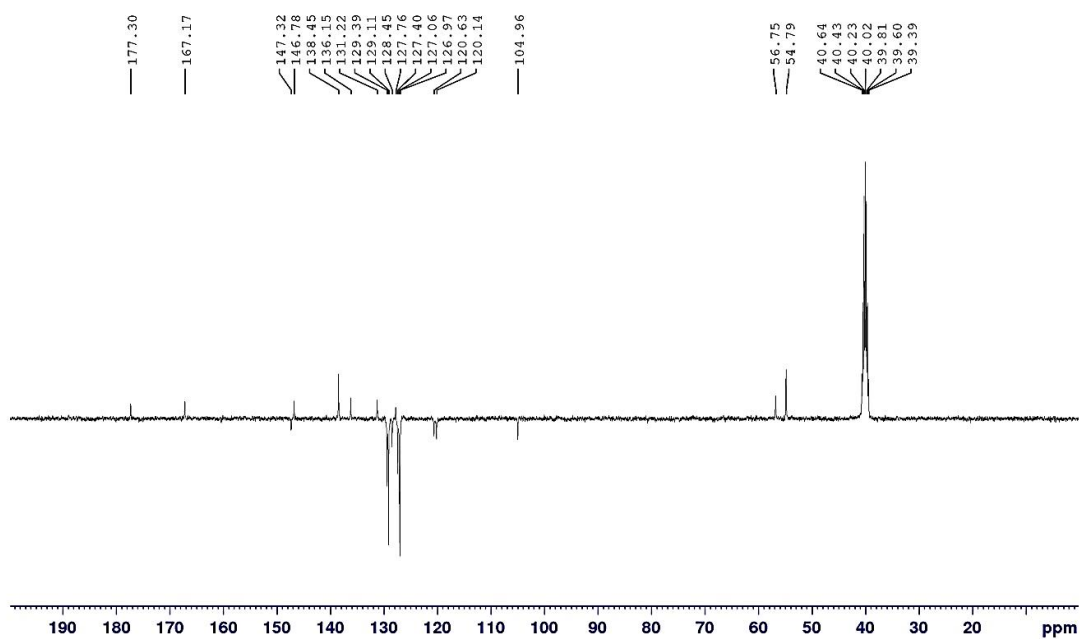

<sup>1</sup>H NMR compound **13c**  
DMSO

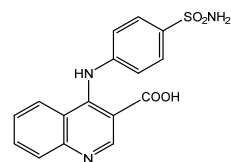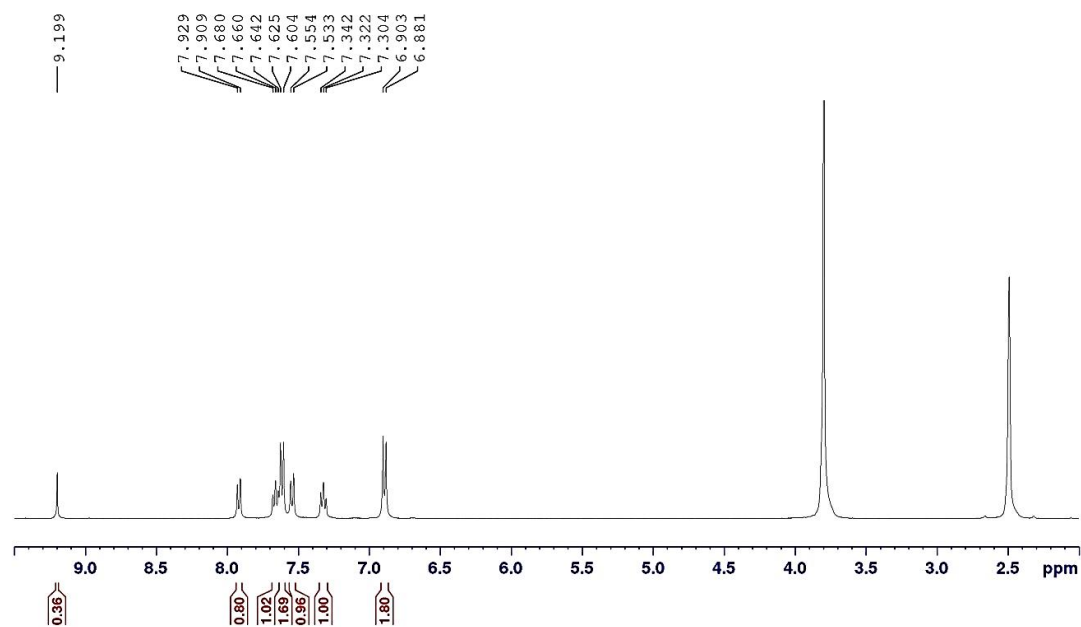

<sup>13</sup>C NMR compound **13c**  
DMSO

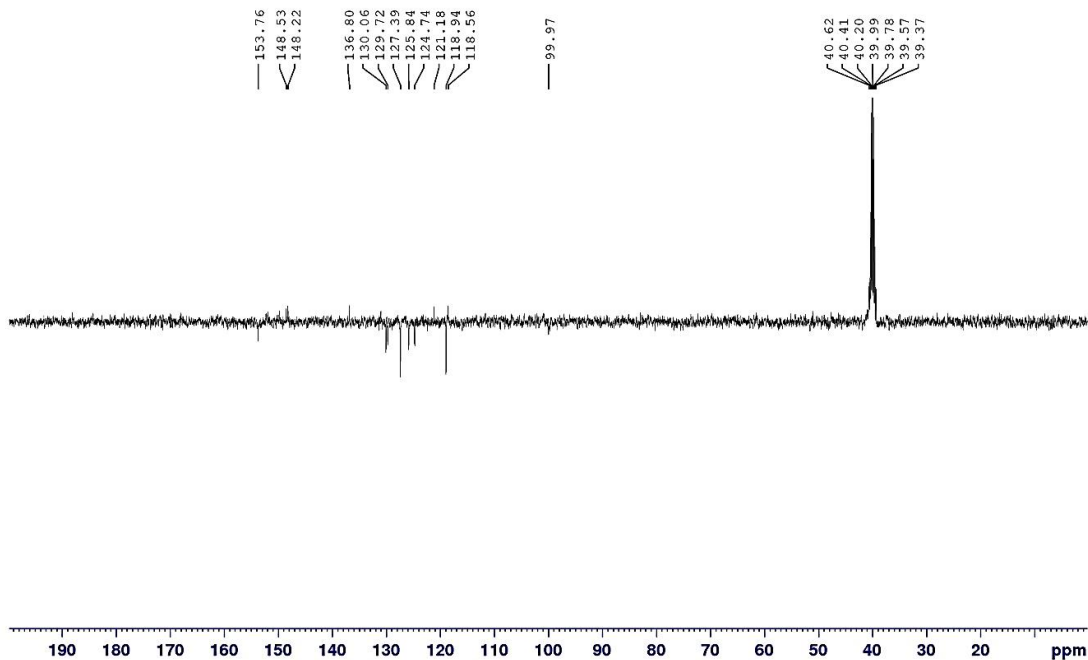

<sup>1</sup>H NMR compound **13d**  
DMSO

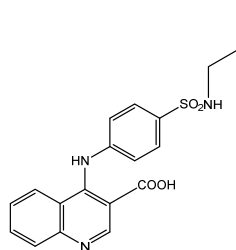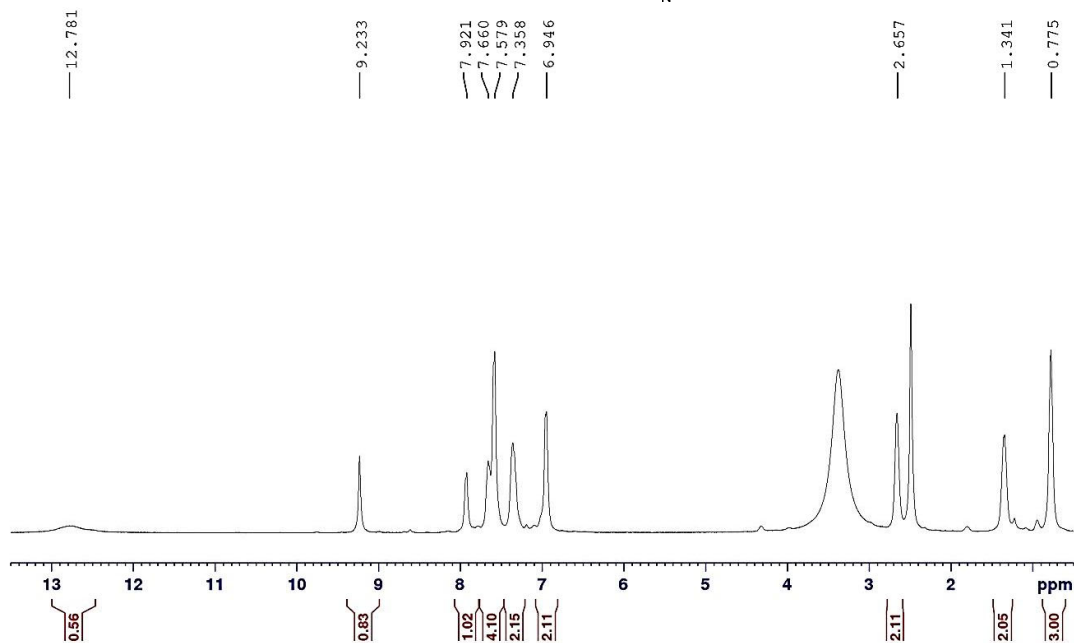

<sup>1</sup>H NMR compound **13d**  
DMSO-D<sub>2</sub>O

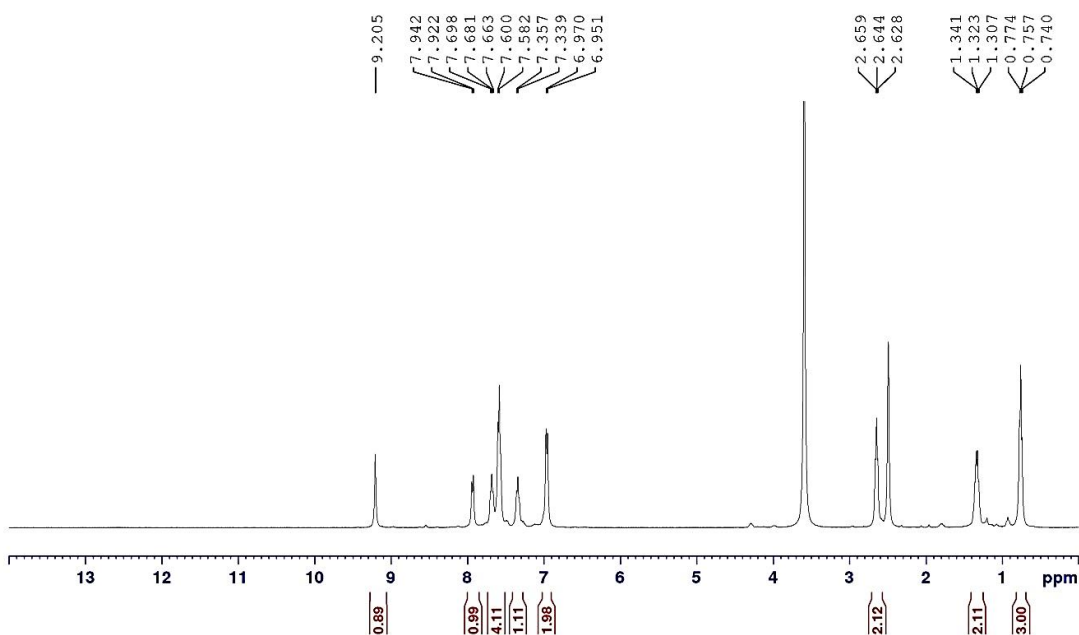

<sup>13</sup>C NMR compound **13d**  
DMSO

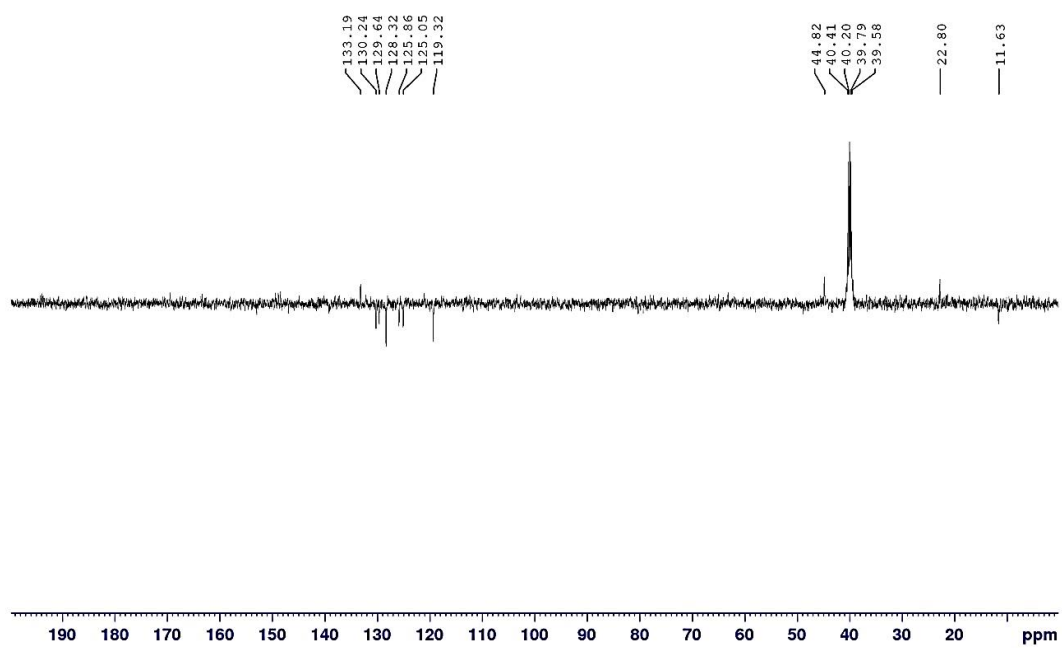

<sup>1</sup>H NMR compound **13f**  
DMSO

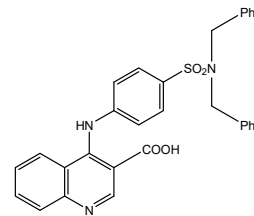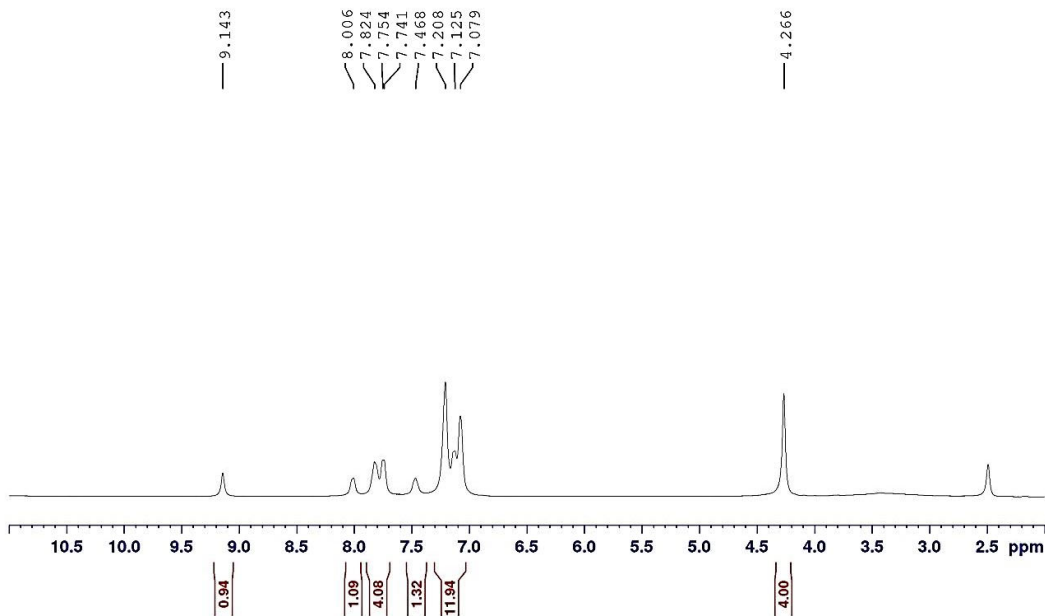

<sup>13</sup>C NMR compound **13f**  
DMSO

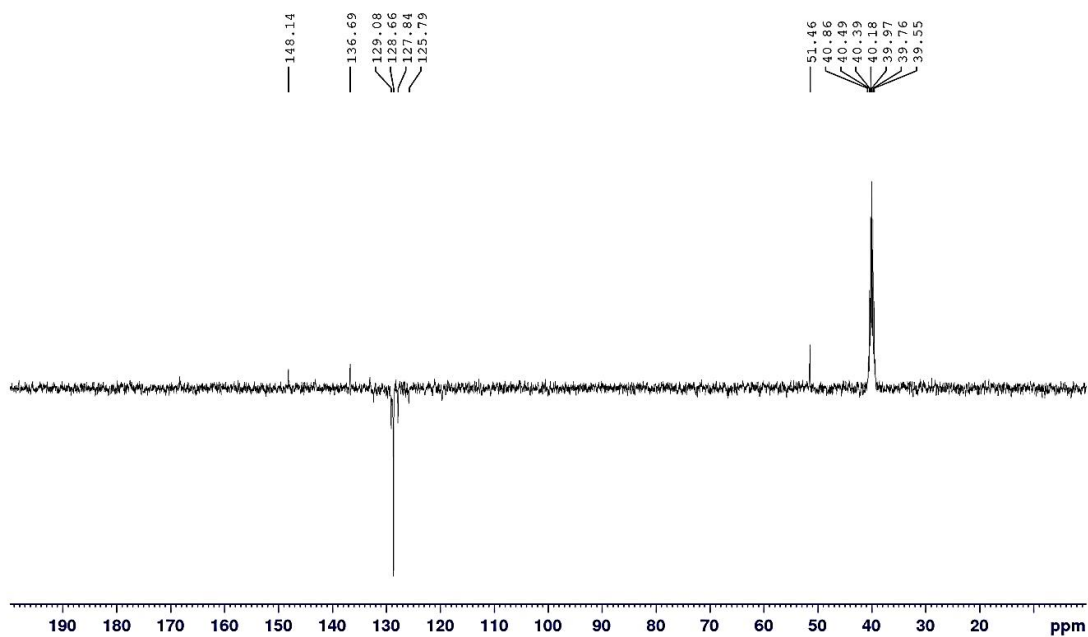

<sup>1</sup>H NMR compound : **13g**  
DMSO

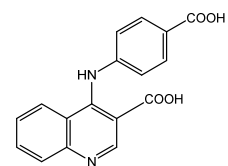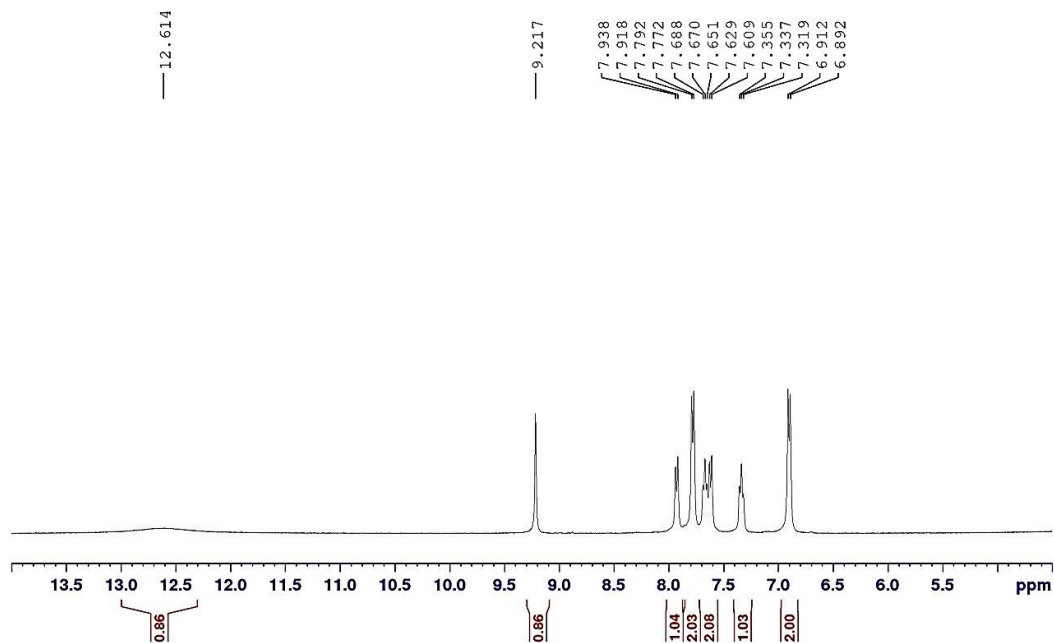

<sup>13</sup>C NMR compound : **13g**  
DMSO

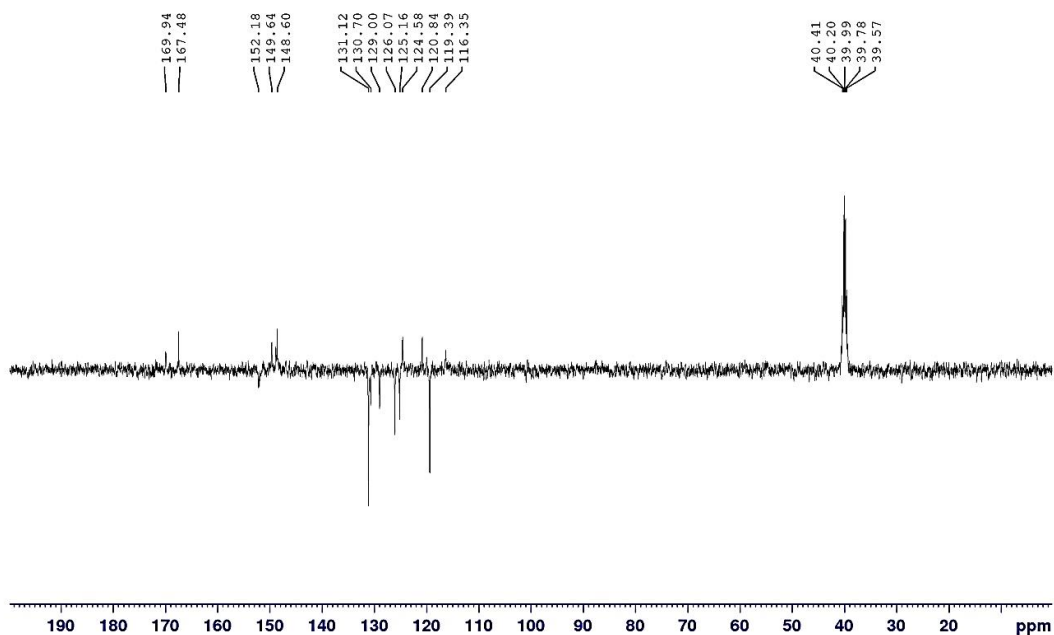



<sup>1</sup>H NMR compound 15  
DMSO

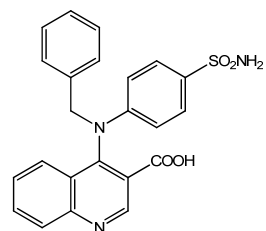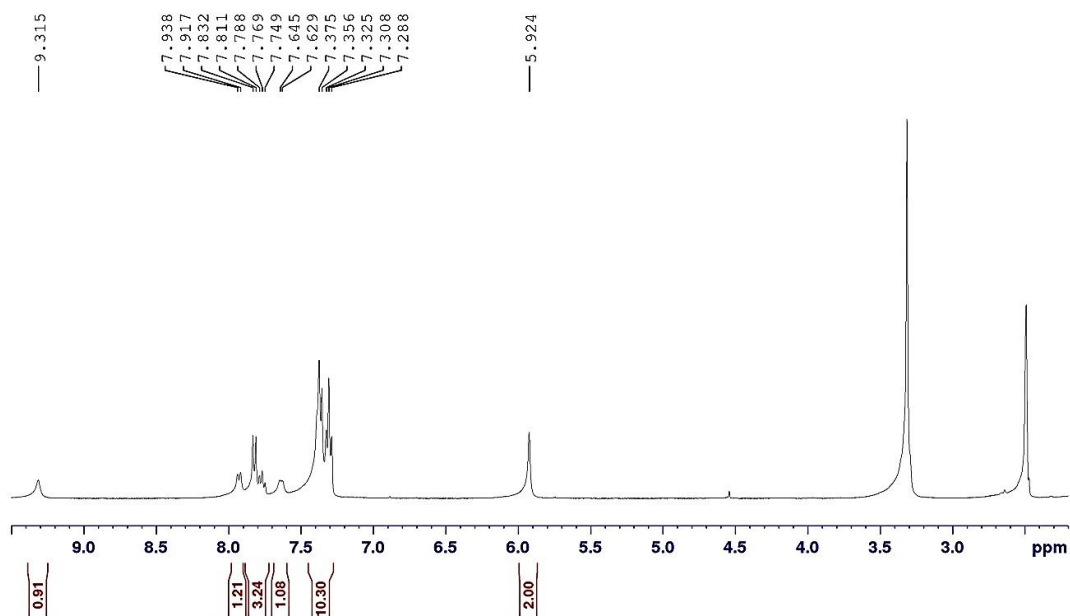

<sup>1</sup>H NMR compound 15  
DMSO+D2O

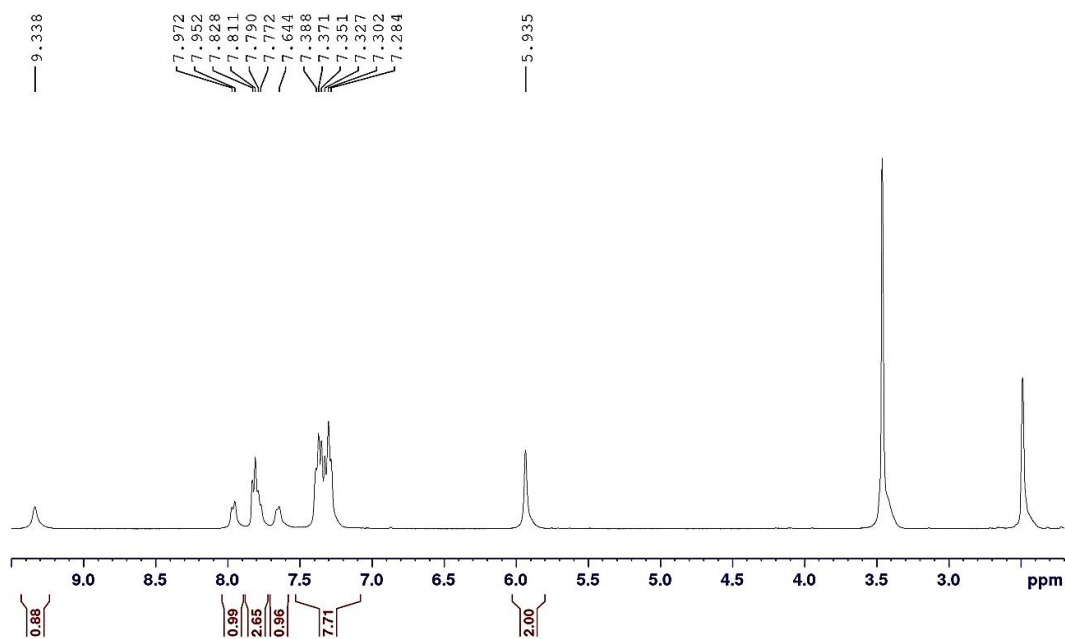

<sup>13</sup>C NMR compound 15  
DMSO

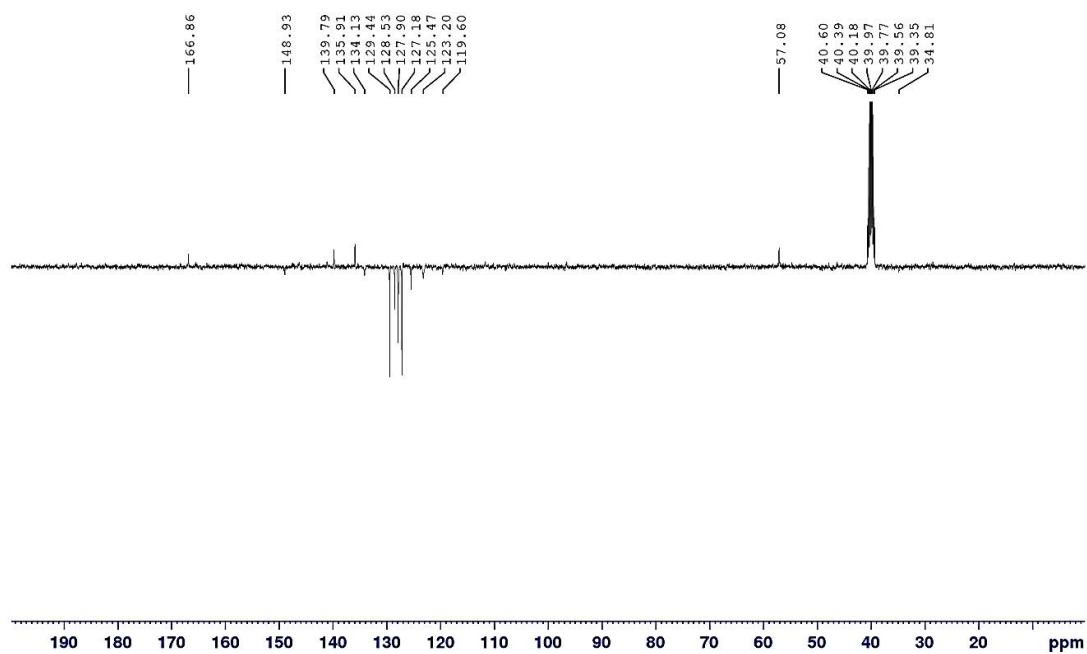

### 3. Chemical stability tests

**Table S1:** Stability of compounds and KEE in PBS and plasma

| Comp.              | PBS (min) | H-pl (min) |
|--------------------|-----------|------------|
| <b>4a</b>          | >120      | >120       |
| <b>4b</b>          | >120      | >120       |
| <b>4d</b>          | >120      | >120       |
| <b>4e</b>          | >120      | >120       |
| <b>4f</b>          | >120      | >120       |
| <b>KEE Control</b> | -         | 119        |

**Table S2:** Elution gradient of mobile phase used for LC-MS/MS analyses

| Time (min) | A (%) | B (%) | Flow (mL min <sup>-1</sup> ) |
|------------|-------|-------|------------------------------|
| 0.00       | 60    | 40    | 0.25                         |
| 2.50       | 10    | 90    | 0.25                         |
| 4.50       | 10    | 90    | 0.25                         |
| 4.51       | 90    | 10    | 0.25                         |
| 6.50       | 90    | 10    | 0.25                         |

solvent A: 5 mM of ammonium formate and 10mM of formic 875 acid in mQ water: acetonitrile 90:10 (v/v) solution;

solvent B: 5 mM of ammonium for-876 mate and 10mM of formic acid in mQ water: acetonitrile 10:90 (v/v) solution.

**Table S3:** MRM parameters

| Compounds | Precursor ion (m/z) | Quantitation ion (m/z) [CE (V)] | Qualification ion (m/z) [CE (V)] |
|-----------|---------------------|---------------------------------|----------------------------------|
| <b>IS</b> | 455                 | 165 [30]                        | -                                |
| <b>4a</b> | 353                 | 91 [15]                         | 307 [15]                         |
| <b>4b</b> | 367                 | 105 [15]                        | 321 [15]                         |
| <b>4d</b> | 395                 | 91 [15]                         | 349 [20]                         |
| <b>4e</b> | 409                 | 217 [30]                        | 363 [20]                         |
| <b>4f</b> | 432                 | 170 [25]                        | 386 [15]                         |

|     |     |          |          |
|-----|-----|----------|----------|
| KEE | 283 | 209 [15] | 105 [30] |
|-----|-----|----------|----------|

**Table S4:** Linear regressions data, linearity coefficients, LOD and LOQ values for each analyte

| Compounds | Slope<br>(PAR/ng mL <sup>-1</sup> ) | Intercept<br>(PAR) | R <sup>2</sup> | y-SD LOD<br>(ng mL <sup>-1</sup> ) | y-SD LOQ<br>(ng mL <sup>-1</sup> ) |
|-----------|-------------------------------------|--------------------|----------------|------------------------------------|------------------------------------|
| <b>4a</b> | 0.102                               | 0.151              | 0.998          | 2.5                                | 7.5                                |
| <b>4b</b> | 0.112                               | 0.142              | 0.997          | 3.4                                | 10.1                               |
| <b>4d</b> | 0.115                               | 0.191              | 0.997          | 3.4                                | 10.2                               |
| <b>4e</b> | 0.112                               | 0.260              | 0.996          | 4.3                                | 12.8                               |
| <b>4f</b> | 0.029                               | 0.031              | 0.999          | 2.0                                | 6.0                                |

### Solution stability profiles

The solution stability profiles in PBS and human plasma were obtained by monitoring the variation of analyte concentration at different incubation times (0, 30, 60 e 120 min. at 37°C). They are reported in **Figures S1-S5**.

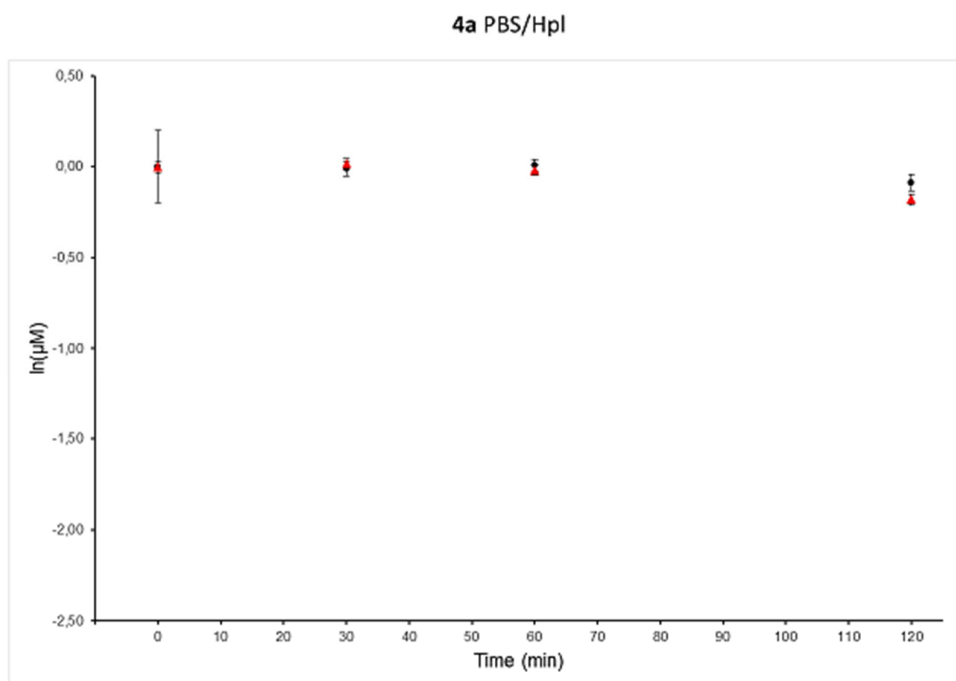

**Figure S1.** Degradation plots of compound **4a** in PBS (black spot) and human plasma (red triangle).

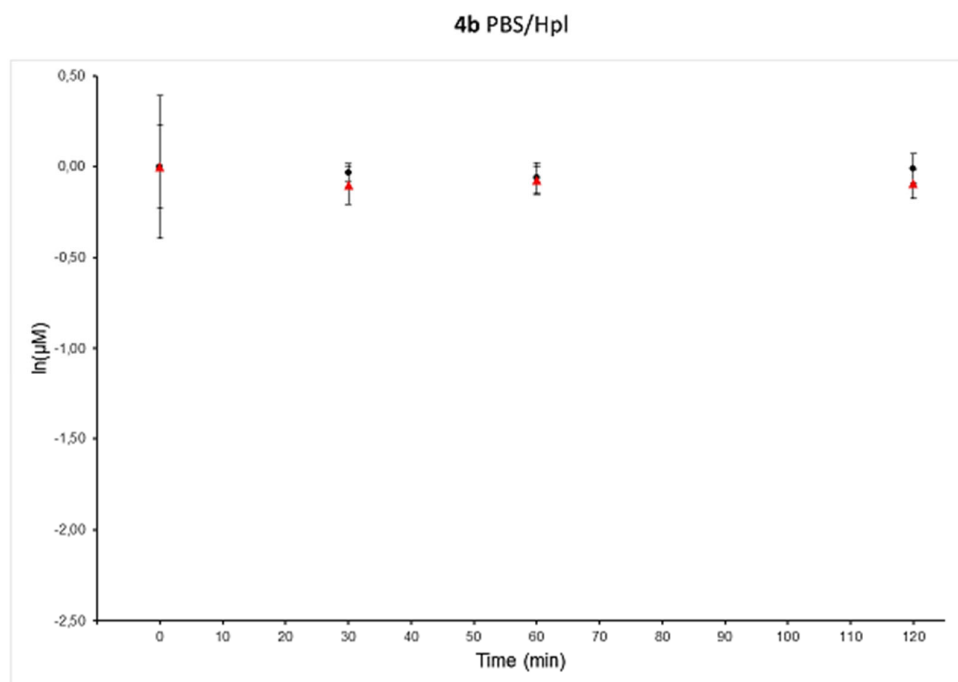

**Figure S2.** Degradation plots of compound **4b** in PBS (black spot) and human plasma (red triangle).

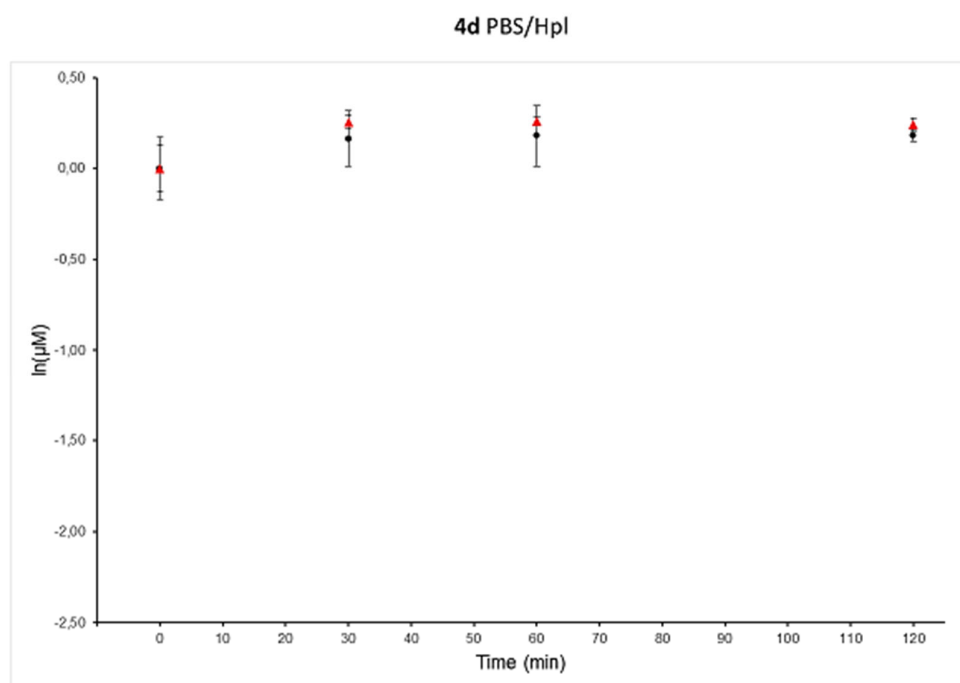

**Figure S3.** Degradation plots of compound **4d** in PBS (black spot) and human plasma (red triangle).

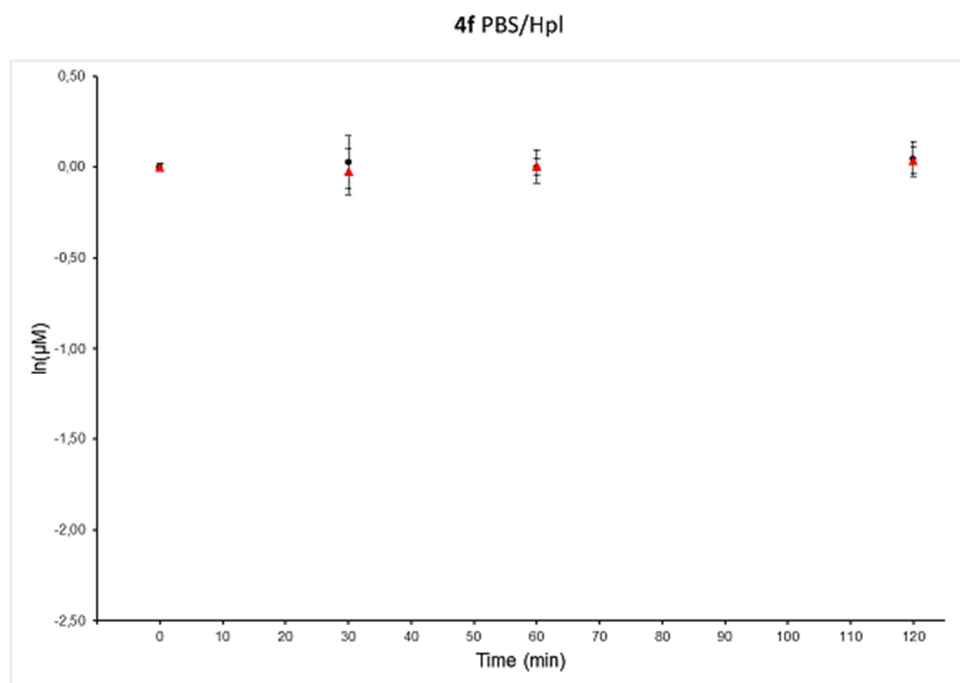

**Figure S4.** Degradation plots of compound **4f** in PBS (black spot) and human plasma (red triangle).

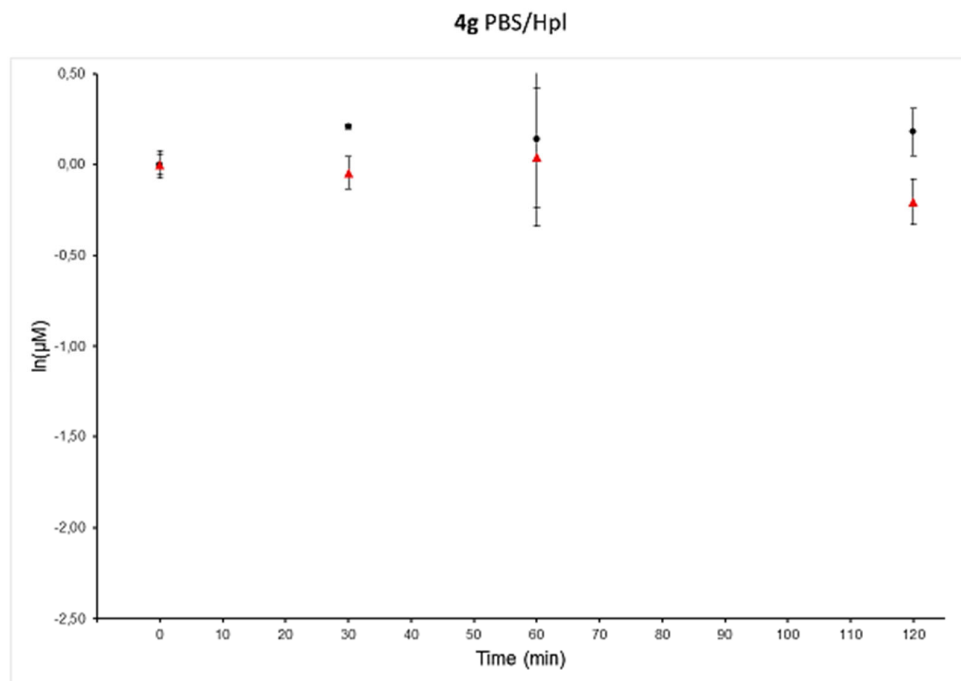

**Figure S5.** Degradation plots of compound **4g** in PBS (black spot) and human plasma (red triangle).

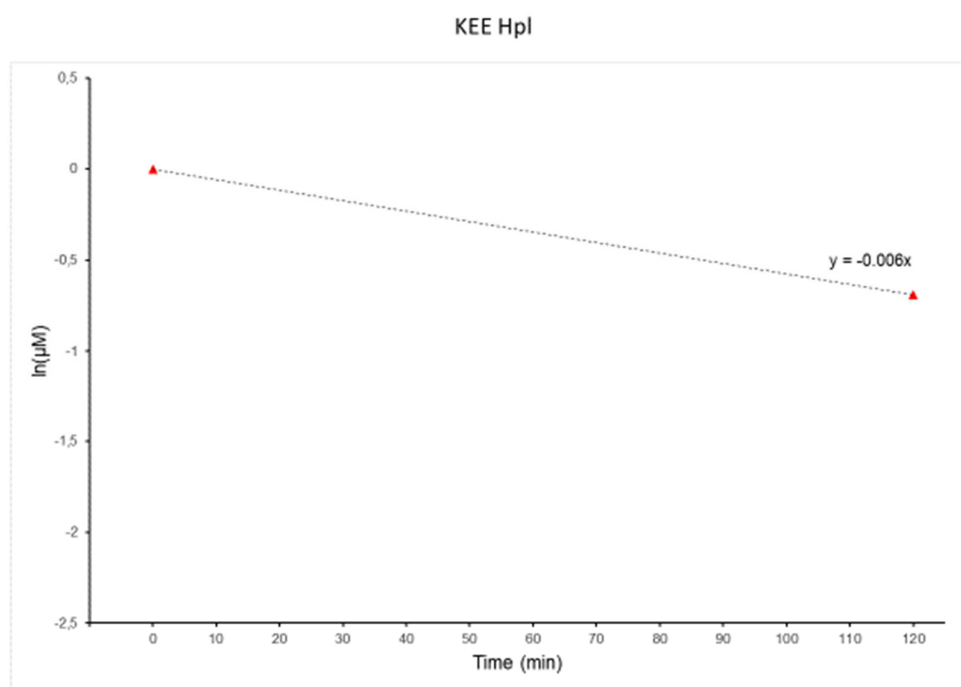

**Figure S6.** Degradation plot of Ketoprofen Ethyl Ester (KEE), reference compound, in human plasma.



#### 4. Single-Crystal X-ray Diffraction

**Table S5.** Crystallographic data and refinement parameters for **4d**.

|                                                       | <b>4d</b>                                                                                                        |
|-------------------------------------------------------|------------------------------------------------------------------------------------------------------------------|
| <b>empirical formula</b>                              | C <sub>22</sub> H <sub>22</sub> N <sub>2</sub> O <sub>5</sub>                                                    |
| <b>formula weight</b>                                 | 394.42                                                                                                           |
| <b>T (K)</b>                                          | 100                                                                                                              |
| <b>Crystal system, space group</b>                    | Triclinic, P-1                                                                                                   |
| <b><math>\lambda</math> (Å)</b>                       | 1.54178                                                                                                          |
| <b>Unit cell dimensions (Å, °)</b>                    | a = 10.451(2), $\alpha$ = 81.071(8)<br>b = 13.852(2), $\beta$ = 71.945(8)<br>c = 15.030(2), $\gamma$ = 69.602(9) |
| <b>V (Å<sup>3</sup>)</b>                              | 1936.2(5)                                                                                                        |
| <b>Z, d<sub>calc</sub>(g/cm<sup>3</sup>)</b>          | 4, 1.353                                                                                                         |
| <b><math>\mu</math> (mm<sup>-1</sup>)</b>             | 0.797                                                                                                            |
| <b>F(000)</b>                                         | 832                                                                                                              |
| <b>Reflections collected/unique</b>                   | 26025 / 6301                                                                                                     |
| <b>Data/parameters</b>                                | 6301 / 523                                                                                                       |
| <b>Final R indices [I&gt;2<math>\sigma</math>(I)]</b> | R1 = 0.0946, wR2 = 0.2538                                                                                        |
| <b>R indices all data</b>                             | R1 = 0.1355, wR2 = 0.3205                                                                                        |
| <b>GoF</b>                                            | 1.168                                                                                                            |

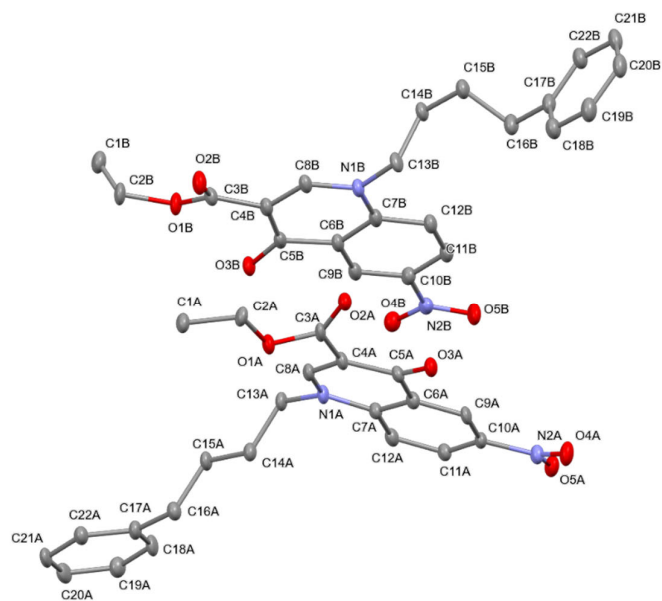

**Figure S7.** Ortep-3 view of the asymmetric unit of **4d**. Hydrogen atoms have been omitted for sake of clarity.

## 5. ADME assessment (Tables S6-S11)

**Table S6.** SwissADME calculated physiochemical properties.

| Mol | Molecular Weight | LogP   | TPSA                  |
|-----|------------------|--------|-----------------------|
| 6f  | 403.372          | 1.3036 | 173.66 Å <sup>2</sup> |
| 6g  | 368.301          | 2.3544 | 142.42 Å <sup>2</sup> |
| 13e | 427.526          | 4.4873 | 107.98 Å <sup>2</sup> |
| 13g | 308.293          | 3.3748 | 99.52 Å <sup>2</sup>  |

**Table S7.** SwissADME calculated lipophilicities parameters.

| Mol | iLOGP | XLOGP3 | WLOGP | MLOGP | Silicos-IT Log P | Consensus Log P |
|-----|-------|--------|-------|-------|------------------|-----------------|
| 6f  | 0.42  | 1.87   | 2.91  | -0.38 | -0.77            | 0.81            |
| 6g  | 0.86  | 2.83   | 2.88  | 0.69  | 0.54             | 1.56            |
| 13e | 3.14  | 4.57   | 5.57  | 0.91  | 2.67             | 3.41            |
| 13g | 1.39  | 3.34   | 3.37  | 0.64  | 2.02             | 2.15            |

**Table S8.** SwissADME calculated water solubility parameters.

| Mol | ESOL Log S | ESOL Solubility (mg/ml) | ESOL Solubility (mol/l) | ESOL Class         | Ali Log S | Ali Solubility (mg/ml) | Ali Solubility (mol/l) | Ali Class          |
|-----|------------|-------------------------|-------------------------|--------------------|-----------|------------------------|------------------------|--------------------|
| 6f  | -3.61      | 9.86E-02                | 2.44E-05                | Soluble            | -5.14     | 2.93E-03               | 7.27E-06               | Moderately soluble |
| 6g  | -4.01      | 3.56E-02                | 9.66E-05                | Soluble            | -5.48     | 1.22E-03               | 3.32E-06               | Moderately soluble |
| 13e | -5.28      | 2.22E-03                | 5.20E-06                | Moderately soluble | -6.75     | 7.64E-05               | 1.79E-07               | Poorly soluble     |
| 13g | -4.11      | 2.41E-02                | 7.83E-05                | Moderately soluble | -5.11     | 2.41E-03               | 7.82E-06               | Moderately soluble |

**Table S9.** SwissADME calculated pharmacokinetics parameters.

| Mol | GI absorp. | BBB perm. | Pgp sub. | CYP2D6 substrate <sup>a</sup> | CYP3A4 substrate <sup>a</sup> | CYP1A2 inhibitor | CYP2C19 inhibitor | CYP2C9 inhibitor | CYP2D6 inhibitor | CYP3A4 inhibitor | log Kp (cm/s) |
|-----|------------|-----------|----------|-------------------------------|-------------------------------|------------------|-------------------|------------------|------------------|------------------|---------------|
| 6f  | Low        | No        | No       | No                            | No                            | No               | No                | Yes              | No               | No               | -7.43         |
| 6g  | Low        | No        | No       | No                            | No                            | No               | No                | Yes              | No               | No               | -6.54         |

|            |      |    |    |    |    |     |     |     |    |     |       |
|------------|------|----|----|----|----|-----|-----|-----|----|-----|-------|
| <b>13e</b> | Low  | No | No | No | No | No  | Yes | Yes | No | Yes | -5.54 |
| <b>13g</b> | High | No | No | No | No | Yes | No  | No  | No | No  | -5.81 |

<sup>a</sup> pkCSM (<http://biosig.unimelb.edu.au>).

**Table S10.** Swiss ADME calculated drug likeness parameters.

| <b>Mo<br/>l</b> | <b>Lipinski<br/>#violations</b> | <b>Ghose<br/>#violations</b> | <b>Veber<br/>#violations</b> | <b>Egan<br/>#violations</b> | <b>Muegge<br/>#violations</b> |
|-----------------|---------------------------------|------------------------------|------------------------------|-----------------------------|-------------------------------|
| <b>6f</b>       | 0                               | 0                            | 1, TPSA>140                  | 1, TPSA>131.6               | 1, TPSA>150                   |
| <b>6g</b>       | 0                               | 0                            | 1, TPSA>140                  | 1, TPSA>131.6               | 0                             |
| <b>13e</b>      | 0                               | 0                            | 0                            | 0                           | 0                             |
| <b>13g</b>      | 0                               | 0                            | 0                            | 0                           | 0                             |

**Table S11.** pkCSM calculated excretion properties.

| <b>Mol</b> | <b>Total Clearance<br/>Log(ml/min/kg)</b> | <b>Renal<br/>OCT2<br/>substrate</b> |
|------------|-------------------------------------------|-------------------------------------|
| <b>6f</b>  | 0.89                                      | No                                  |
| <b>6g</b>  | 0.73                                      | No                                  |
| <b>13e</b> | 0.70                                      | No                                  |
| <b>13g</b> | 0.34                                      | No                                  |

6. Table S12. Elemental analysis

| Comp. | Formula (MW)                                                             | Anal. Calcd. |      |       |  | Anal. Found |      |       |
|-------|--------------------------------------------------------------------------|--------------|------|-------|--|-------------|------|-------|
|       |                                                                          | C            | H    | N     |  | C           | H    | N     |
| 4b    | C <sub>20</sub> H <sub>18</sub> N <sub>2</sub> O <sub>5</sub> (366.37)   | 65.57        | 4.95 | 7.65  |  | 65.83       | 4.97 | 7.68  |
| 4c    | C <sub>21</sub> H <sub>20</sub> N <sub>2</sub> O <sub>5</sub> (380.39)   | 66.31        | 5.30 | 7.36  |  | 66.57       | 5.32 | 7.39  |
| 4d    | C <sub>22</sub> H <sub>22</sub> N <sub>2</sub> O <sub>5</sub> (394.42)   | 66.99        | 5.62 | 7.10  |  | 66.72       | 5.59 | 7.07  |
| 4e    | C <sub>23</sub> H <sub>24</sub> N <sub>2</sub> O <sub>5</sub> (408.45)   | 67.63        | 5.92 | 6.86  |  | 67.36       | 5.90 | 6.83  |
| 4f    | C <sub>19</sub> H <sub>17</sub> N <sub>3</sub> O <sub>7</sub> S (431.42) | 52.90        | 3.97 | 9.74  |  | 53.11       | 3.98 | 9.78  |
| 4g    | C <sub>20</sub> H <sub>16</sub> N <sub>2</sub> O <sub>7</sub> (396.35)   | 60.61        | 4.07 | 7.07  |  | 60.85       | 4.09 | 7.10  |
| 5c    | C <sub>21</sub> H <sub>20</sub> N <sub>2</sub> O <sub>5</sub> (380.39)   | 66.31        | 5.30 | 7.36  |  | 66.57       | 5.32 | 7.39  |
| 5e    | C <sub>23</sub> H <sub>24</sub> N <sub>2</sub> O <sub>5</sub> (408.45)   | 67.63        | 5.92 | 6.86  |  | 67.36       | 5.90 | 6.83  |
| 6a    | C <sub>17</sub> H <sub>12</sub> N <sub>2</sub> O <sub>5</sub> (324.29)   | 62.96        | 3.73 | 8.64  |  | 62.71       | 3.71 | 8.60  |
| 6b    | C <sub>18</sub> H <sub>14</sub> N <sub>2</sub> O <sub>5</sub> (338.31)   | 63.90        | 4.17 | 8.28  |  | 63.64       | 4.15 | 8.25  |
| 6c    | C <sub>19</sub> H <sub>16</sub> N <sub>2</sub> O <sub>5</sub> (352.34)   | 64.77        | 4.58 | 7.95  |  | 64.51       | 4.56 | 7.92  |
| 6d    | C <sub>20</sub> H <sub>18</sub> N <sub>2</sub> O <sub>5</sub> (366.37)   | 65.57        | 4.95 | 7.65  |  | 65.83       | 4.97 | 7.68  |
| 6e    | C <sub>21</sub> H <sub>20</sub> N <sub>2</sub> O <sub>5</sub> (380.39)   | 66.31        | 5.30 | 7.36  |  | 66.57       | 5.32 | 7.39  |
| 6f    | C <sub>17</sub> H <sub>13</sub> N <sub>3</sub> O <sub>7</sub> S (403.37) | 50.62        | 3.25 | 10.42 |  | 50.42       | 3.24 | 10.38 |
| 6g    | C <sub>18</sub> H <sub>12</sub> N <sub>2</sub> O <sub>7</sub> (368.30)   | 58.70        | 3.28 | 7.61  |  | 58.46       | 3.27 | 7.58  |
| 8     | C <sub>17</sub> H <sub>14</sub> N <sub>2</sub> O <sub>3</sub> (294.30)   | 69.38        | 4.79 | 9.52  |  | 69.66       | 4.81 | 9.56  |
| 9     | C <sub>33</sub> H <sub>30</sub> N <sub>2</sub> O <sub>3</sub> (502.60)   | 78.86        | 6.02 | 5.57  |  | 78.54       | 5.99 | 5.54  |
| 10    | C <sub>31</sub> H <sub>26</sub> N <sub>2</sub> O <sub>3</sub> (474.55)   | 78.46        | 5.52 | 5.90  |  | 78.77       | 5.54 | 5.92  |
| 12a   | C <sub>15</sub> H <sub>13</sub> N <sub>3</sub> O <sub>2</sub> S (299.35) | 60.18        | 4.38 | 14.04 |  | 60.42       | 4.40 | 14.09 |
| 12b   | C <sub>16</sub> H <sub>12</sub> N <sub>2</sub> O <sub>2</sub> (264.28)   | 72.72        | 4.58 | 10.60 |  | 72.43       | 4.56 | 10.55 |
| 12c   | C <sub>18</sub> H <sub>17</sub> N <sub>3</sub> O <sub>4</sub> S (371.41) | 58.21        | 4.61 | 11.31 |  | 58.44       | 4.63 | 11.35 |
| 12d   | C <sub>21</sub> H <sub>23</sub> N <sub>3</sub> O <sub>4</sub> S (413.49) | 61.00        | 5.61 | 10.16 |  | 61.24       | 5.63 | 10.20 |
| 12e   | C <sub>24</sub> H <sub>29</sub> N <sub>3</sub> O <sub>4</sub> S (455.57) | 63.28        | 6.42 | 9.22  |  | 63.53       | 6.44 | 9.25  |
| 12f   | C <sub>32</sub> H <sub>29</sub> N <sub>3</sub> O <sub>4</sub> S (551.66) | 69.67        | 5.30 | 7.62  |  | 69.39       | 5.38 | 7.59  |
| 12g   | C <sub>19</sub> H <sub>16</sub> N <sub>2</sub> O <sub>4</sub> (366.35)   | 67.85        | 4.80 | 8.33  |  | 67.58       | 4.82 | 8.36  |
| 13c   | C <sub>16</sub> H <sub>13</sub> N <sub>3</sub> O <sub>4</sub> S (343.36) | 55.97        | 3.82 | 12.24 |  | 55.75       | 3.80 | 12.19 |
| 13d   | C <sub>19</sub> H <sub>19</sub> N <sub>3</sub> O <sub>4</sub> S (385.44) | 59.21        | 4.97 | 10.90 |  | 59.45       | 4.99 | 10.94 |
| 13e   | C <sub>22</sub> H <sub>25</sub> N <sub>3</sub> O <sub>4</sub> S (427.52) | 61.81        | 5.89 | 9.83  |  | 61.56       | 5.87 | 9.79  |
| 13f   | C <sub>30</sub> H <sub>25</sub> N <sub>3</sub> O <sub>4</sub> S (523.61) | 68.82        | 4.81 | 8.03  |  | 68.54       | 4.79 | 8.00  |
| 13g   | C <sub>17</sub> H <sub>12</sub> N <sub>2</sub> O <sub>4</sub> (308.29)   | 66.23        | 3.92 | 9.09  |  | 66.49       | 3.93 | 9.12  |
| 14    | C <sub>25</sub> H <sub>23</sub> N <sub>3</sub> O <sub>4</sub> S (461.53) | 65.06        | 5.02 | 9.10  |  | 65.32       | 5.04 | 9.13  |

|    |                                                                          |       |      |      |  |       |      |      |
|----|--------------------------------------------------------------------------|-------|------|------|--|-------|------|------|
| 15 | C <sub>23</sub> H <sub>19</sub> N <sub>3</sub> O <sub>4</sub> S (433.48) | 63.73 | 4.42 | 9.69 |  | 63.47 | 4.40 | 9.65 |
|----|--------------------------------------------------------------------------|-------|------|------|--|-------|------|------|
